# Supplementary material
Source: publisher site journal article supplement (https://static.cambridge.org/content/id/urn:cambridge.org:id:article:S1365100521000274/resource/name/S1365100521000274supp001.pdf)
Supplement: Supplementary file 1 [file S1365100521000274supp001.pdf]

Online appendix of “Is Bigger More Effective?  
Shock Size and the Efficacy of Monetary Policy”

Toyoichiro Shirota<sup>†</sup>

April 2021

## 1 Additional robustness checks

Table 1 summarizes the additional robustness checks.

Following the SBIC, this study sets the lag length of the main results as one. However, the AIC suggests five lags as a preferable lag length. Column (a) shows that the main results are unchanged even when using the five-lag specification. The difference in impulse responses between the large and small shocks remain significant and similar to the benchmark results.

In the benchmark model, I use  $\theta = 3$  for the smoothness parameter of the logistics function. This is the same as in Tenreyro and Thwaites (2016). To check the robustness to

---

<sup>†</sup>Hokkaido University, [toyoichiro.shirota@econ.hokudai.ac.jp](mailto:toyoichiro.shirota@econ.hokudai.ac.jp); Kita 9 Nishi 7, Kita-ku, Sapporo, Hokkaido, 060-0809, Japan. I am grateful to the editor, two anonymous referees, Ippei Fujiwara, Yasuo Hirose, James Morley, Keiichiro Kobayashi, Masao Ogaki, participants of RCAST macroeconomic workshop at University of Tokyo, the annual meeting of the EEA and WEAI, for comments and suggestions. All errors are on my own. This research is supported by a grant-in-aid from Murata Science Foundation and JSPS KAKENHI Grant Number 18K01558.

alternative parameter values, Column (b) presents the results under  $\theta = 9$ . It also shows that the differences in impulses are significant between large and small shocks.

In the benchmark model, I assume that the volatility of the monetary policy shocks is time-invariant. However, monetary policy shocks may switch between high- and low-volatility processes as in Hamilton (1989). If shocks' volatility is time varying, economic agents change their behavior under high- and low-volatility regimes. Consequently, economic responses to large and small shocks could be observed differently. Taking this scenario into consideration, we adopt the following regime-switching Romer regression model as an alternative policy reaction function,

$$\begin{aligned} \Delta FF_t &= \kappa(s_t)' \mathbf{X}_t + \tilde{\epsilon}_t, \quad s_t = \{0, 1\}, \\ \tilde{\epsilon}_t &\sim N(0, \sigma_{\tilde{\epsilon}}(s_t)), \\ \mathbf{p} &= \begin{bmatrix} p_{0,0} & 1 - p_{1,1} \\ 1 - p_{0,0} & p_{1,1} \end{bmatrix}, \end{aligned} \tag{1}$$

where parameters  $\{\kappa(s_t), \sigma_{\tilde{\epsilon}}(s_t)\}$  vary depending on the state  $s_t$  and  $\mathbf{p}$  denotes the matrix of state transition probabilities.

Column (c) reports that the impulse responses are significantly different between the high- and low-volatility regimes.

The ‘‘FOMC dates’’ in column (d) suggests that the main results are robust even if the monetary policy shocks of FOMC months are used for estimation.

This study presents the impulse response functions after adjusting an initial shock to equalize the area under the responses of the federal funds rate up to the 36th month. Although this length of adjustment period is the same one as in Coibion (2012), Column (e) also checks whether the results are robust to the alternative length of adjustment. Specifi-

cally, Column (e) reports that the differences between the large and small shocks remain significant even if I apply the adjustment up to the 26th month, in which the responses of production hit their negative peak.

Table 1: Responses of industrial production: robustness checks

| $h$ | (a) Alternative lags |              |                  | (b) Alternative smoothness |              |                  | (c) High/low volatility regime |              |                  | (d) FOMC dates |              |                  | (e) FF rate path matching |              |                  |
|-----|----------------------|--------------|------------------|----------------------------|--------------|------------------|--------------------------------|--------------|------------------|----------------|--------------|------------------|---------------------------|--------------|------------------|
|     | 5 lags               |              |                  | $\theta = 9$               |              |                  |                                |              |                  |                |              |                  | up to 26th month          |              |                  |
|     | Small shocks         | Large shocks | Diff. $t$ -value | Small shocks               | Large shocks | Diff. $t$ -value | Small shocks                   | Large shocks | Diff. $t$ -value | Small shocks   | Large shocks | Diff. $t$ -value | Small shocks              | Large shocks | Diff. $t$ -value |
| 6   | 0.0182               | -0.0012      | 0.8523           | 0.0117                     | 0.0056       | 0.3998           | -0.0026                        | 0.0036       | -0.3204          | 0.0162         | 0.0039       | 0.3236           | 0.0202                    | 0.0119       | 0.4297           |
| 12  | -0.014               | -0.0219      | 0.378            | -0.0163                    | -0.0069      | -0.5902          | -0.0033                        | -0.0114      | 0.2607           | -0.0384        | -0.0109      | -0.7298          | -0.0139                   | -0.0198      | 0.2098           |
| 18  | -0.084               | -0.0231      | -2.3613          | -0.0697                    | -0.0129      | -3.2656          | -0.0287                        | -0.0241      | -0.1588          | -0.1501        | -0.0193      | -2.9924          | -0.0782                   | -0.0337      | -1.7798          |
| 24  | -0.1587              | -0.022       | -3.5939          | -0.126                     | -0.0173      | -4.5732          | -0.0956                        | -0.0271      | -2.0978          | -0.2641        | -0.0241      | -3.9592          | -0.1512                   | -0.0417      | -3.1678          |
| 30  | -0.1608              | -0.02        | -4.019           | -0.1251                    | -0.0188      | -5.1074          | -0.114                         | -0.025       | -2.9597          | -0.227         | -0.0263      | -3.5979          | -0.1532                   | -0.0455      | -3.4245          |
| 36  | -0.1301              | -0.007       | -3.8729          | -0.0878                    | -0.0086      | -4.7388          | -0.0922                        | -0.0108      | -2.744           | -0.1305        | -0.0158      | -2.2929          | -0.1085                   | -0.0199      | -3.3412          |

Note: The left column denotes the months after a contractionary monetary policy shock. In (a), the lag length of the covariates is five based on the AIC. In (b), the smoothness parameter of the smooth transition model is nine. In (c), monetary policy shocks are identified with Hamilton (1989)'s Markov switching model with high- and low-volatility states. Large shocks are defined as shocks that occur when the estimated probability of the high volatility regime exceeds 50%. In (d), the data for non-FOMC months are excluded. In (e), the initial impulse is adjusted to equvalate the areas under the federal funds rate up to the 26th month for both small and large shocks.

## 2 Relation to the previous studies

Lo and Piger (2005) found that asymmetry related to the size of policy actions disappears once business cycle phases are considered.

A key difference between this study and Lo and Piger (2005) is the monetary policy shocks. Employing a recursive vector autoregression (VAR) model, they identified monetary policy shocks, in which, as Romer and Romer (2004) argue, endogenous and anticipatory movements of monetary policy actions remain, whereas this study identifies the improved measure of monetary policy shocks following Romer and Romer (2004).

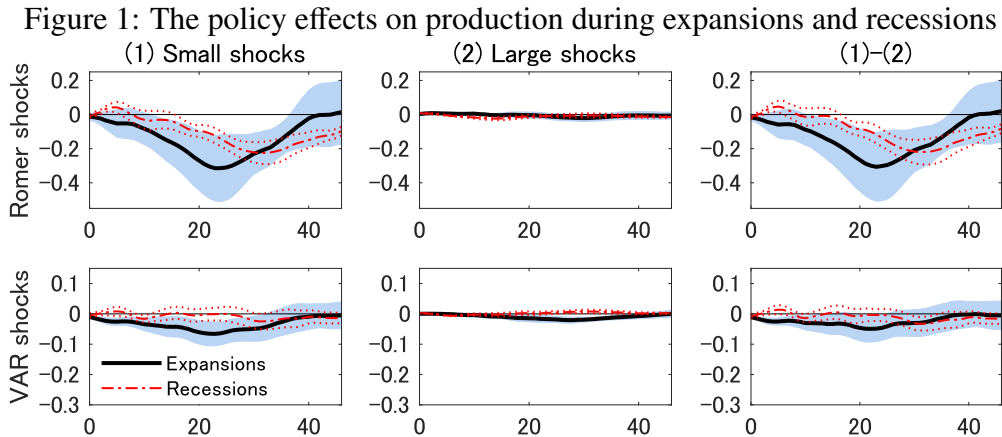

Note: Thick lines and shaded areas depict the impulse responses and 90 percent confidence intervals estimated after excluding the NBER recession periods, respectively. Broken lines with dotted lines are impulse responses and 90 percent confidence intervals after excluding the NBER expansion periods, respectively.

To investigate whether the difference in policy shocks creates the discrepancy between the results of this study and this previous work, we consider an additional exercise. In this, the estimation procedure is the same as for the main results, except for the monetary policy shocks, which are identified using a recursive VAR model as in Lo and Piger (2005).<sup>1</sup> The

<sup>1</sup>To maintain consistency with the previous analysis, this study uses a three-variable VAR model of

first row of Figure 1 represents the results in the main text for comparison. The second row of Figure 1 shows that the differences between small and large shocks become almost insignificant when the policy shocks are those used in the previous study. Thus, it appears that some of the conclusions in the former study depend on an inaccurate measure of monetary policy shocks.<sup>2</sup> Therefore, we consider that the conclusion of this study is robust if monetary policy shocks are properly estimated.

## References

**Coibion, Olivier**, “Are the Effects of Monetary Policy Shocks Big or Small?,” *American Economic Journal: Macroeconomics*, April 2012, 4 (2), 1–32.

**Hamilton, James D.**, “A New Approach to the Economic Analysis of Nonstationary Time Series and the Business Cycle,” *Econometrica*, March 1989, 57 (2), 357–384.

**Lo, Ming Chien and Jeremy Piger**, “Is the Response of Output to Monetary Policy Asymmetric? Evidence from a Regime-Switching Coefficients Model,” *Journal of Money, Credit and Banking*, October 2005, 37 (5), 865–886.

**Romer, Christina D. and David H. Romer**, “A New Measure of Monetary Shocks: Derivation and Implications,” *American Economic Review*, September 2004, 94 (4), 1055–1084.

---

logged output, logged PCE deflator, and the effective federal funds rate.

<sup>2</sup>I also check that Lo and Piger (2005)’s main conclusion (that the asymmetry relates to the business cycle phases) is unchanged even when the monetary policy shock is replaced with Romer and Romer (2004)’s shocks.

**Tenreyro, Silvana and Gregory Thwaites**, “Pushing on a String: US Monetary Policy Is Less Powerful in Recessions,” *American Economic Journal: Macroeconomics*, October 2016, 8 (4), 43–74.
